# Supplementary material
Source: publisher figshare collection journal article supplement (https://acs.figshare.com/ndownloader/files/11152916)
Supplement: Supplementary file 1 [file 11152916]

## Supporting Information

### Up-Conversion Luminescence from $\text{Ln}^{3+}$ ( $\text{Ho}^{3+}$ , $\text{Pr}^{3+}$ ) Ions Doped $\text{BaCl}_2$ Particles via NIR Light of Sun Excitation

Hong Jia<sup>a,\* b</sup>, Zhongli Liu<sup>a</sup>, Lamei Liao<sup>a</sup>, Yanhong Gu<sup>a</sup>, Chaoliang Ding<sup>a</sup>, Jianguo Zhao<sup>a</sup>,  
Weiyang zhang<sup>a</sup>, Xiaoke Hu<sup>a</sup>, Xun Feng<sup>a</sup>, Zhi Chen<sup>c\*</sup>, Xiaofeng Liu<sup>b</sup>, and Jianrong Qiu<sup>b\*, c</sup>

<sup>a</sup> College of Physics and Electronic Information & Henan Key Laboratory of Electromagnetic Transformation and Detection, Luoyang Normal University, Luoyang 471934, China.

<sup>b</sup> State Key Laboratory of Silicon Materials, Department of Materials Science and Engineering, Zhejiang University, Hangzhou 310027, China.

<sup>c</sup> State Key Laboratory of Luminescent Materials and Devices, and Guangdong Provincial Key Laboratory of Fiber Laser Materials and Applied Techniques, South China University of Technology, Guangzhou 510641, China.

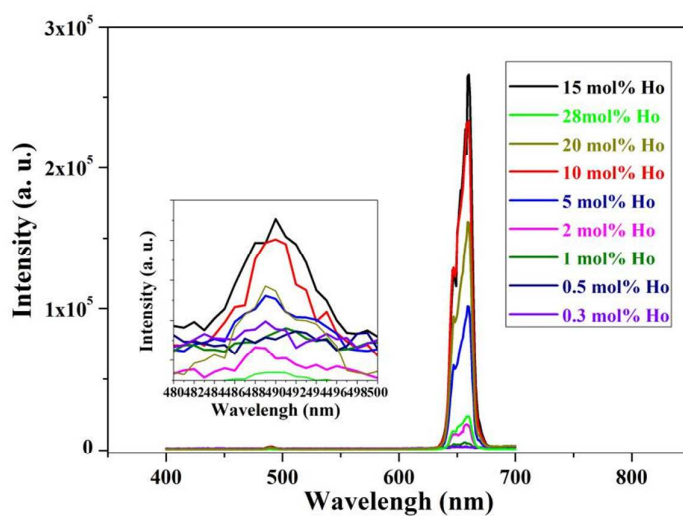

Figure S1: UC emission spectra of  $\text{BaCl}_2: \text{Ho}^{3+}$  under excitation by NIR part ( $990 \text{ nm} > \text{wavelength } \lambda > 800 \text{ nm}$ ) of sunlight.

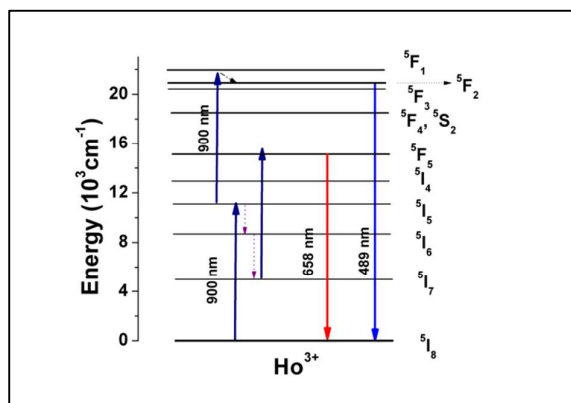

Figure S2: Energy level diagrams of  $\text{Ho}^{3+}$  ion involving possible UC process under excitation of incoherent NIR( $990 \text{ nm} > \text{wavelength } \lambda > 800 \text{ nm}$ ) from sunlight.



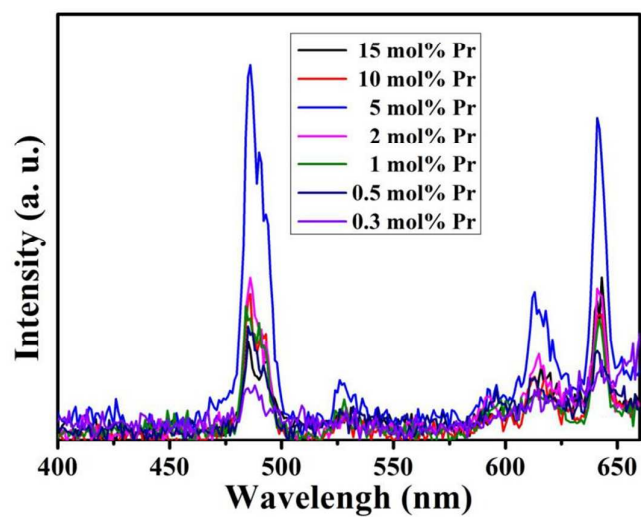

Figure S5: UC emission intensity of  $\text{BaCl}_2: \text{Pr}^{3+}$  under excitation of incoherent NIR (wavelength  $\lambda > 800 \text{ nm}$ ) from sunlight.

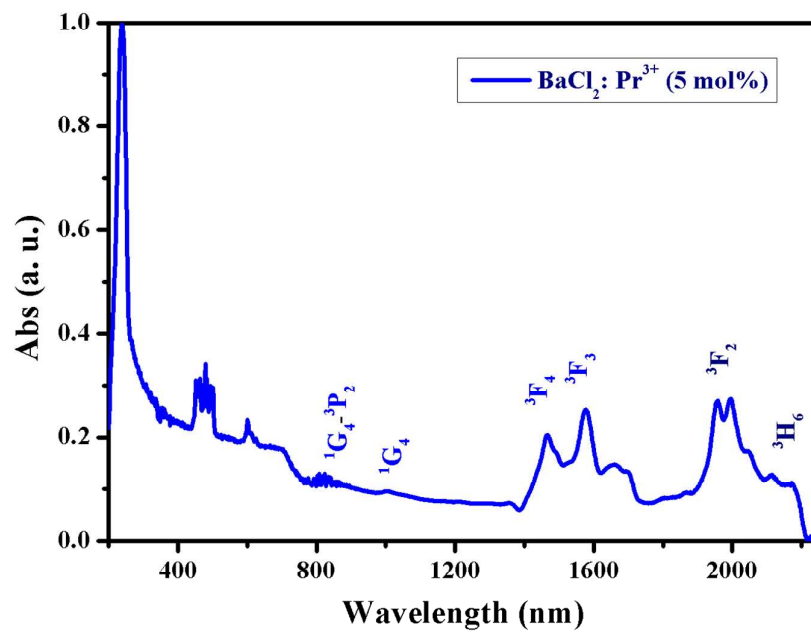

Figure S6: Absorption spectrum of  $\text{BaCl}_2: \text{Pr}^{3+}$  phosphor.

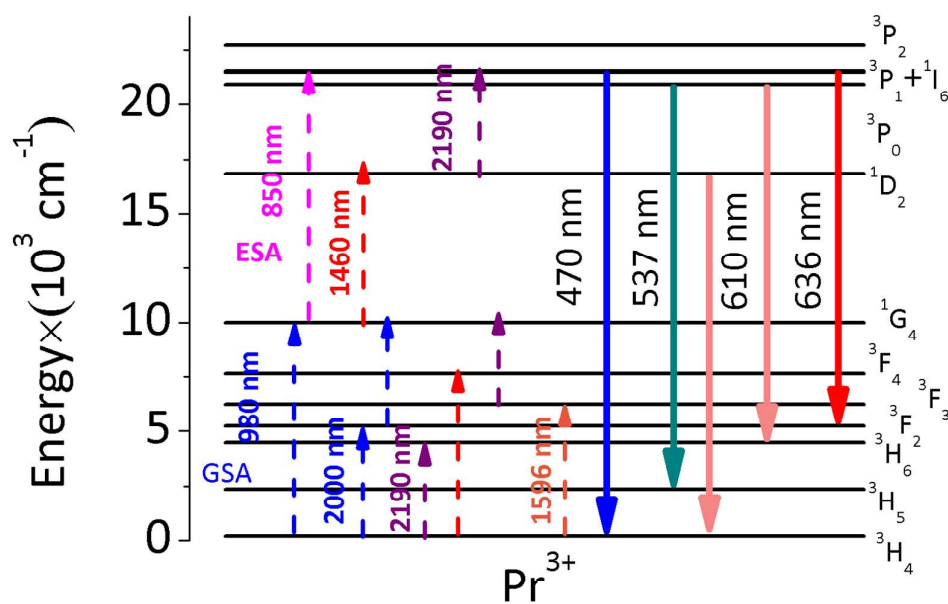

Figure S7: Energy level diagrams of  $\text{Pr}^{3+}$  ion involving possible UC processes excitation of incoherent

NIR(wavelength  $\lambda > 800 \text{ nm}$ ) from sunlight.

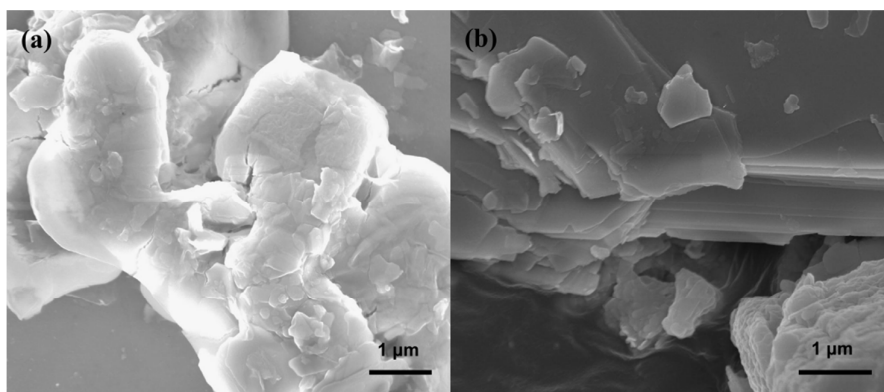

Figure S8: (a) SEM image of  $\text{BaCl}_2: 15\%\text{Ho}^{3+}$ , (b) SEM image of  $\text{BaCl}_2: 5\%\text{Pr}^{3+}$ .
